# Supplementary material
Source: PubMed Central journal article supplement (PMC2678592)
Supplement: 0901202106_0901202106SI.pdf [file 0901202106_0901202106SI.pdf]

# Supporting Information

Pedersen et al. 10.1073/pnas.0901202106

## SI Text

**Equations.** Granule compartments measured in number of granules. Abbreviations as in Fig. 1 except AP, “almost-docked pool;” FIP,  $F_{IRP}$ ; RIP,  $R_{IRP}$ ; FHP,  $F_{HCSP}$ ; and RHP,  $R_{HCSP}$ .

$$IRP' = r_1 PP - r_{-1} IRP - f_I(C_{md})IRP, \quad [1]$$

$$PP' = r_{-1} IRP - (r_1 + r_{-2})PP + r_2 DP, \quad [2]$$

$$DP' = r_3 HCSP + r_{-2} PP - (r_{-3} + r_2)DP, \quad [3]$$

$$HCSP' = r_4 AP - (r_{-4} + r_3)HCSP + r_{-3} DP - f_H(C_i)HCSP, \quad [4]$$

$$AP' = r_5 - (r_{-5} + r_4) AP + r_{-4} HCSP, \quad [5]$$

$$FIP' = f_I(C_{md})IRP - u_2 FIP, \quad [6]$$

$$RIP' = u_2 FIP - u_3 RIP, \quad [7]$$

$$FHP' = f_H(C_i)HCSP - u_2 FHP, \quad [8]$$

$$RHP' = u_2 FHP - u_3 RHP. \quad [9]$$

Fusion rates from IRP ( $f_I$ ) and HCSP ( $f_H$ ) follow Hill functions.

$$f_I(C_{md}) = f_{I,\max} \frac{C_{md}^n}{C_{md}^n + K_I^n}, \quad f_H(C_i) = f_{H,\max} \frac{C_i^n}{C_i^n + K_H^n}, \quad [10]$$

where  $C_{md}$  is the  $Ca^{2+}$  concentration in microdomains,  $C_i$  the bulk cytosolic  $Ca^{2+}$  concentration, measured in micromolar.

Calcium compartments are modeled as in Chen et al. (9) and described by

$$C'_{md} = -f_{md}J_L - f_{md}B(C_{md} - C_i), \quad [11]$$

$$C'_i = -f_i J_R + f_i f_i B(C_{md} - C_i) - f_i L. \quad [12]$$

Molar fluxes through L- and R-type channels:

$$J_L = \alpha I_L / v_{md}, \quad J_R = \alpha I_R / v_{cell}. \quad [13]$$

where the respective currents are

$$I_L = g_L m_\infty(V)(V - V_{Ca}), \quad I_R = g_R m_\infty(V)(V - V_{Ca}), \quad [14]$$

with  $m_\infty(v) = 1/(1 + \exp((V_m - V)/s_m))$ .

Calcium pumps and stores

$$J_{serca} = J_{serca,\max} \frac{C_i^2}{K_{serca}^2 + C_i^2}, \quad J_{pmca} = J_{pmca,\max} \frac{C_i}{K_{pmca} + C_i}, \quad [15]$$

$$J_{ncx} = J_{ncx,0}(C_i - 0.25 \mu M), \quad L = J_{serca} + J_{pmca} + J_{ncx} + J_{leak}. \quad [16]$$

To follow capacitance increases, the fusion fluxes are multiplied by 3.5 fF per granule and integrated, i.e.,

$$Cap_{IRP} = 3.5 \int_0^t f_I IRP, \quad Cap_{HCSP} = 3.5 \int_0^t f_H HCSP. \quad [17]$$

Similarly, to follow secretion, the release fluxes are multiplied by 9 pg per granule per islet (see ref. 1) and by 60 to change from seconds to minutes.

$$Secr_{IRP} = 60 \cdot 9 \cdot u_3 RI, \quad Secr_{HCSP} = 60 \cdot 9 \cdot u_3 RH. \quad [18]$$

We show mainly the 2-min moving averages of these expression.

**Initial Conditions.** All simulations are started from steady-state. For the standard parameters (see below) this yields the following initial conditions:  $IRP(0) = 7.69$ ,  $PP(0) = 38.45$ ,  $DP(0) = 297.17$ ,  $HCSP(0) = 12.06$ ,  $AP(0) = 964.8$ ,  $FIP(0) = 1.5 \times 10^{-7}$ ,  $RIP(0) = 2.3 \times 10^{-5}$ ,  $FHP(0) = 8 \times 10^{-5}$ ,  $RHP(0) = 0.012$ ,  $C_{md}(0) = 0.0674 \mu M$ ,  $C_i(0) = 0.06274 \mu M$ .

**Parameters.** Vesicle dynamics parameters ( $s^{-1}$ ):  $r_1 = 0.005$ ,  $r_{-1} = 0.025$ ,  $r_2 = 0.00014$ ,  $r_{-2} = 0.001$ ,  $r_3 = 0.00185$ ,  $r_{-3} = 0.00007$ ,  $r_4 = 0.002$ ,  $r_{-4} = 0.16$ ,  $r_5 = 0.22$ ,  $r_{-5} = 0.0002$ ,  $u_1 = 2000$ ,  $u_2 = 3$ ,  $u_3 = 0.02$ .

Fusion constants:  $f_{I,\max} = 30 s^{-1}$ ,  $K_I = 22 \mu M$ ,  $f_{H,\max} = 30 s^{-1}$ ,  $K_H = 2.5 \mu M$ ,  $n = 4$ .

Calcium currents:  $g_L = 150 pS$ ,  $g_R = 150 pS$ ,  $V_m = -20 mV$ ,  $V_{Ca} = 25 mV$ ,  $s_m = 5 mV$ .

Calcium fluxes:  $J_{serca,\max} = 41 \mu M/s$ ,  $K_{serca} = 0.27 \mu M$ ,  $J_{pmca,\max} = 2,141 \mu M/s$ ,  $K_{pmca} = 0.5 \mu M$ ,  $J_{leak} = -0.9441 \mu M/s$ ,  $J_{ncx,0} = 18.67 s^{-1}$ ,  $f_{md} = 0.01$ ,  $f_i = 0.01$ ,  $B = 17,250 s^{-1}$ ,  $\alpha = 5.18 \times 10^{-15} \mu mol/s/fA$ ,  $v_{cell} = 1.15 pl$ ,  $v_{md} = 0.00385 \times 10^{-3} pl$ ,  $f_v = v_{md}/v_{cell}$ .

1. Chen Y, Wang S, Sherman A (2008) Identifying the targets of the amplifying pathway for insulin secretion in pancreatic beta-cells by kinetic modeling of granule exocytosis. *Biophys J* 95:2226–2241.

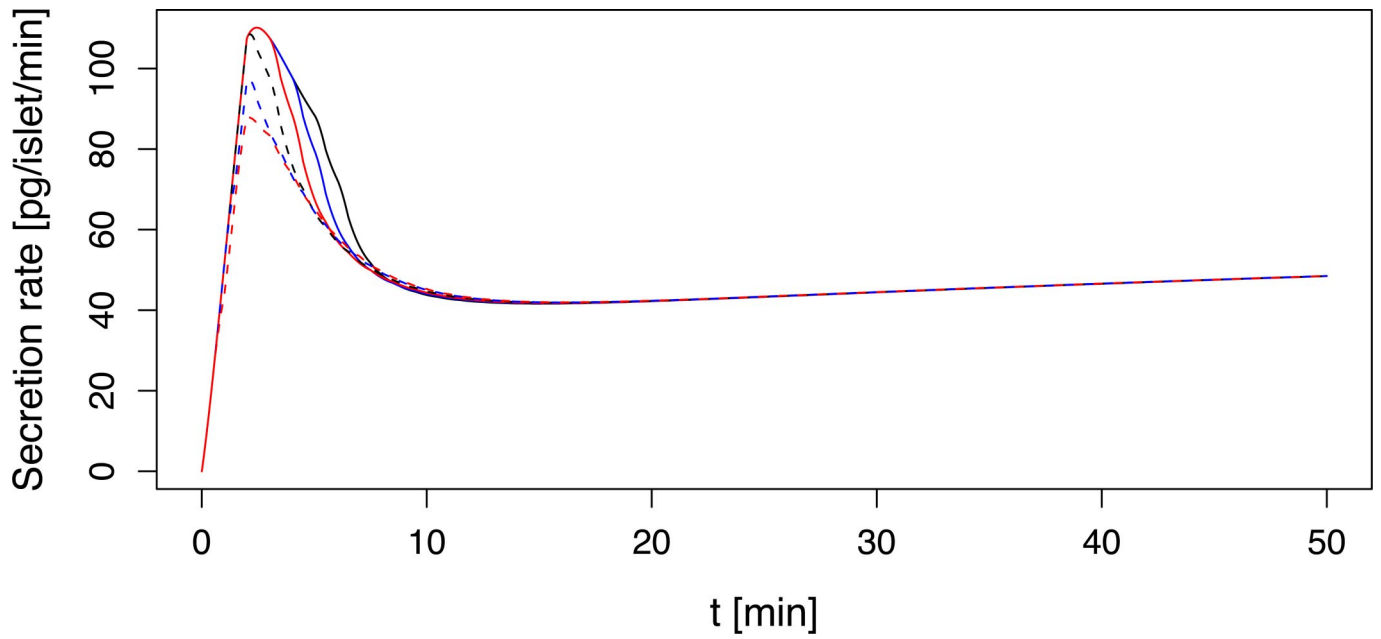

**Fig. S1.** Two-minute moving average of total secretion rates due to an imposed burst-like pattern with a period of 1 min. The length of the depolarization was varied from 30 s (dashed red), through 1 min (dashed blue), 2 min (dashed black), 3 min (solid red), 4 min (solid blue) to 5 min (solid black). (see ref. 1).

1. Henquin J-C, Nenquin M, Stiernet P, Ahren B (2006) In vivo and in vitro glucose-induced biphasic insulin secretion in the mouse: Pattern and role of cytoplasmic  $\text{Ca}^{2+}$  and amplification signals in beta-cells. *Diabetes* 55:441–451.

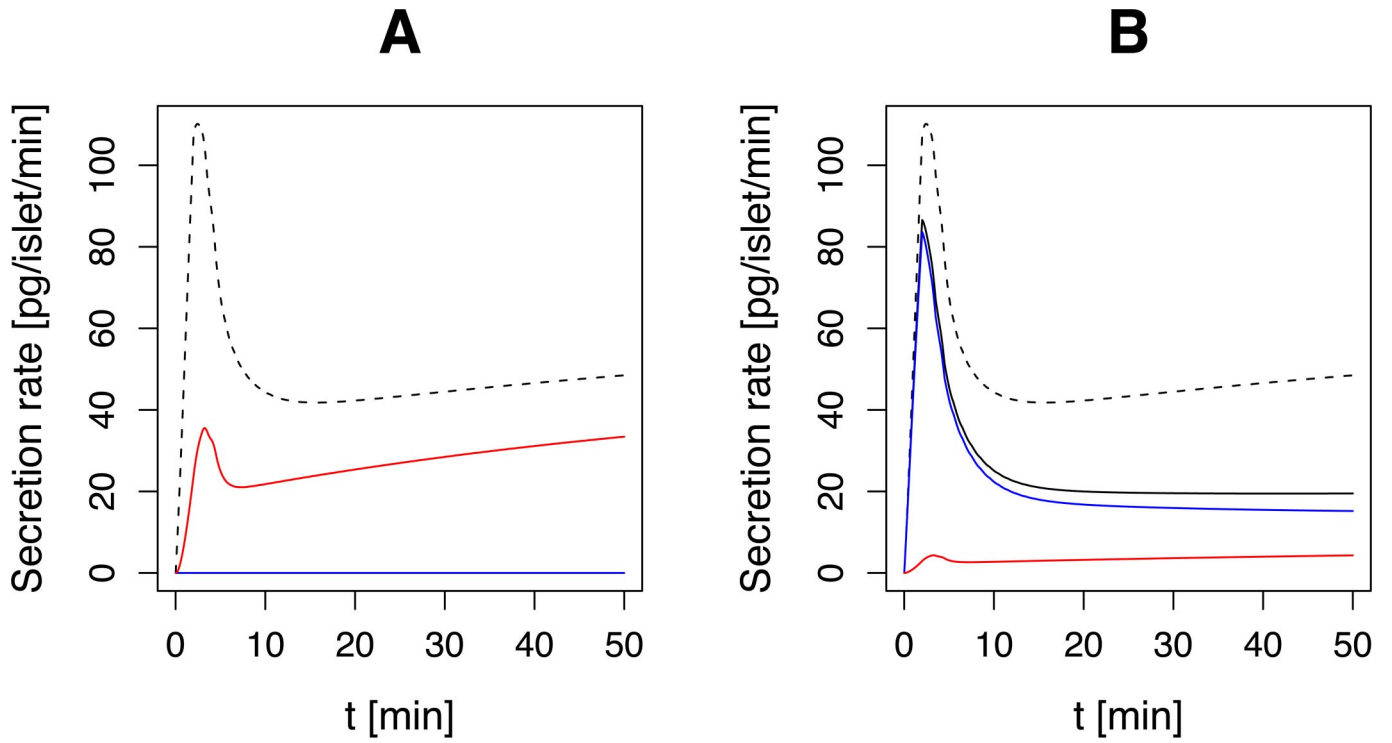

**Fig. S2.** Two-minute moving average of total secretion rates with an imposed burst-like pattern with a period of 1 min. (A) L-type knockout [ $g_L$  set to zero, and  $g_R = 300$  pS up-regulated to compensate (1)]. (B) R-type knock-out (2) ( $g_R = 0$  pS). Legends as in Fig. 3. For comparison, the dashed line taken from Fig. 3 shows total wild-type release.

1. Schulla V, et al. (2003) Impaired insulin secretion and glucose tolerance in beta cell-selective Ca(v)1.2 Ca<sup>2+</sup> channel null mice. *EMBO J* 22:3844–3854.
2. Jing X, et al. (2005) CaV2.3 calcium channels control second-phase insulin release. *J Clin Invest* 115:146–154.

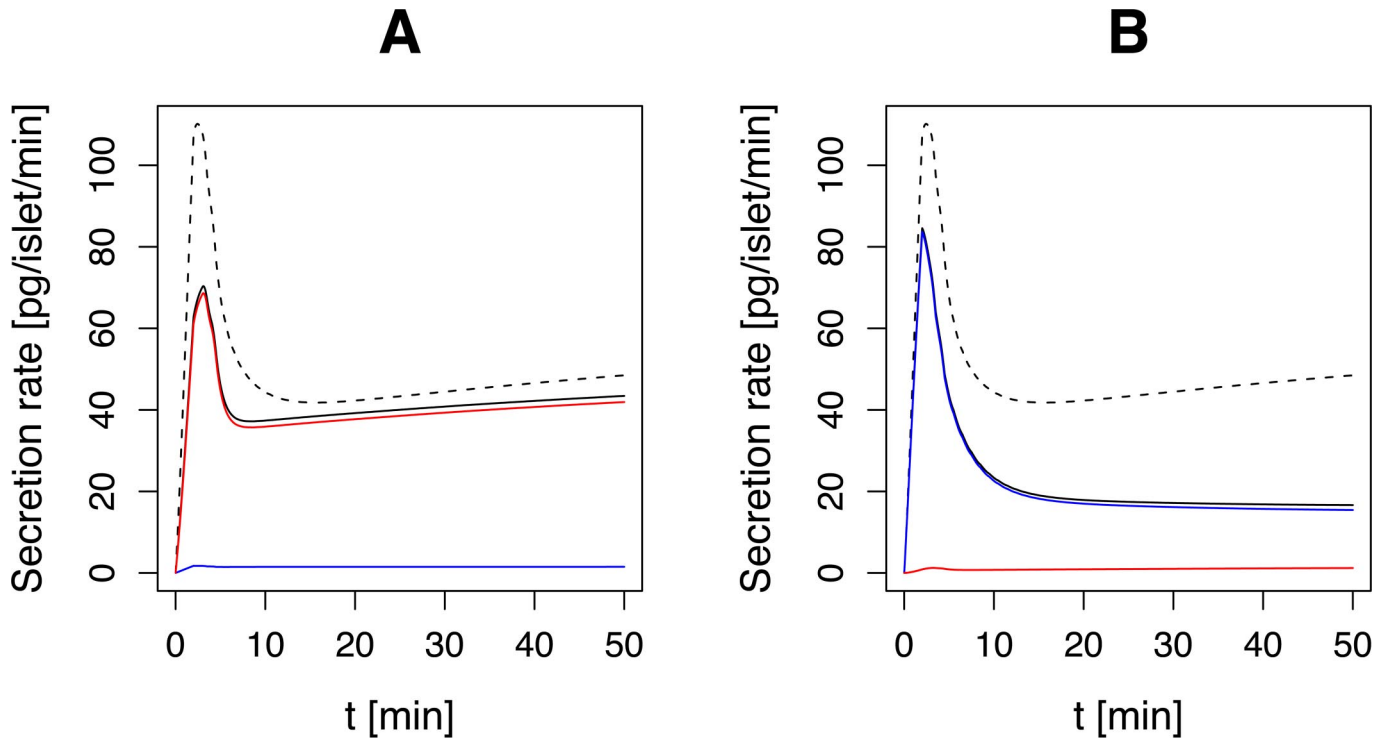

**Fig. S3.** Two-minute moving average of total secretion rates with an imposed burst-like pattern with a period of 1 min. (A) Synt1A knockout (low docking rate,  $r_3$  reduced 90%) (1). (B) Hypothetical knockout of HCSP  $Ca^{2+}$  sensor (fusion from the HCSP lowered by a factor of 30). Legends as in Fig. 3. For comparison, the dashed line taken from Fig. 3 shows total wild-type release.

1. Ohara-Imaizumi M, et al. (2007) Imaging analysis reveals mechanistic differences between first- and second-phase insulin exocytosis. *J Cell Biol* 177:695–705.

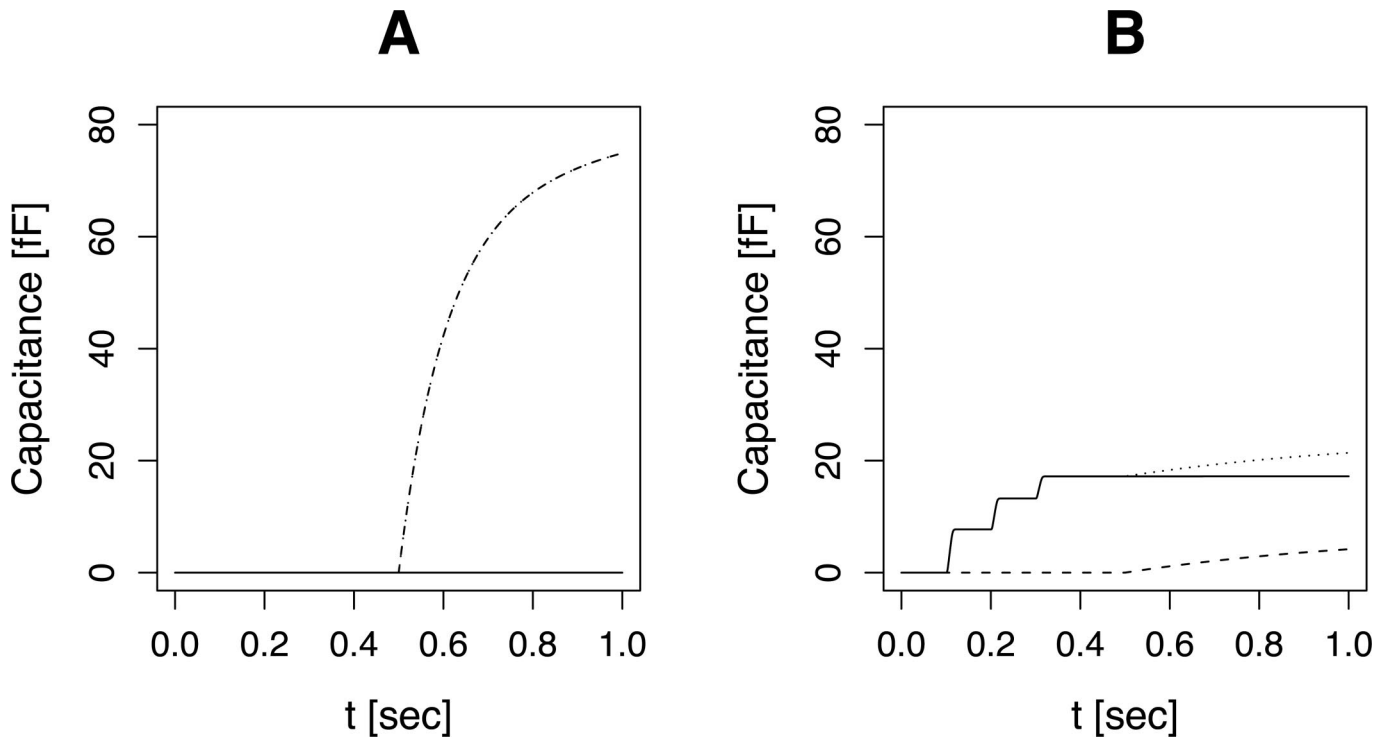

**Fig. S4.** (A) Predicted fast HCSP protocol for Synt-1A knockout (1). Parameters are as in Fig. S3A. (B) Predicted fast HCSP protocol for hypothetical knockout of HCSP Ca<sup>2+</sup> sensor. Parameters are as in Fig. S3B.

1. Ohara-Imaizumi M, et al. (2007) Imaging analysis reveals mechanistic differences between first- and second-phase insulin exocytosis. *J Cell Biol* 177:695–705.
